# Supplementary material
Source: HighWire-hosted journal article supplement (https://erj.ersjournals.com/content/60/3/2200440)
Supplement: inline-supplementary-material-1 [file inline-supplementary-material-1.pdf]

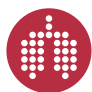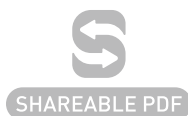

# Planetary respiratory health for asthma, rhinoconjunctivitis and eczema

Joan B. Soriano <sup>1,2,3</sup>

<sup>1</sup>Servicio de Neumología, Hospital Universitario de la Princesa, Madrid, Spain. <sup>2</sup>Facultad de Medicina, Universidad Autónoma de Madrid, Madrid, Spain. <sup>3</sup>Centro de Investigación en Red de Enfermedades Respiratorias (CIBERES), Instituto de Salud Carlos III (ISCIII), Madrid, Spain.

Corresponding author: Joan B. Soriano ([jbsoriano2@gmail.com](mailto:jbsoriano2@gmail.com))

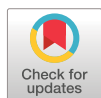

Shareable abstract ([@ERSpublications](https://twitter.com/ERSpublications))

**More descriptive and analytical epidemiology on asthma, hay fever and eczema are welcome**  
<https://bit.ly/3ISD1RQ>

**Cite this article as:** Soriano JB. Planetary respiratory health for asthma, rhinoconjunctivitis and eczema. *Eur Respir J* 2022; 60: 2200440 [DOI: 10.1183/13993003.00440-2022].

This single-page version can be shared freely online.

Copyright ©The authors 2022. For reproduction rights and permissions contact [permissions@ersnet.org](mailto:permissions@ersnet.org)

Received: 27 Feb 2022  
Accepted: 1 March 2022

Whatever the severity of any health condition, if the prevalence is in double digits globally, the implications for planetary health are tremendous. Should we consider the allergic triad of asthma, rhinoconjunctivitis and eczema (figure 1), periodic monitoring of their burden and determinants of change are fundamental for planning the existing efforts and forecasting the use of always limited resources.
